# Supplementary material
Source: Springer Nature journal article supplement (https://www.springermedizin.de/resource/supplementary/12891_2007_515_MOESM3_ESM.pdf/9511210)

# Morphometric Vertebral Deformities

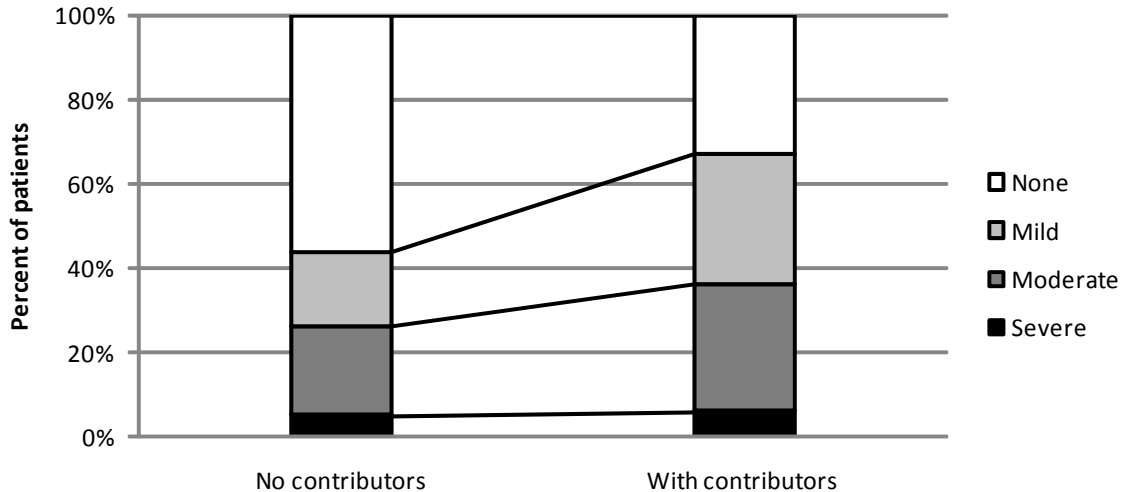

Supplement: MOESM3 [file 9511210]
